# Supplementary material for: A ratiometric lysosomal pH probe based on the naphthalimide–rhodamine system
Source: Royal Society of Chemistry journal article supplement (doi:10.1039/c4tb02082k), 2015-01-01
Supplement: c4tb02082k1.pdf [file c4tb02082k1.pdf]

## Electronic Supplementary Information

### **A ratiometric lysosomal pH probe based on naphthalimide- rhodamine system**

Xiao-Fan Zhang,<sup>a</sup> Tao Zhang,<sup>b</sup> Shi-Li Shen,<sup>a</sup> Jun-Ying Miao<sup>\*b</sup> and Bao-Xiang Zhao<sup>\*a</sup>

<sup>a</sup> *Institute of Organic Chemistry, School of Chemistry and Chemical Engineering,  
Shandong University, Jinan 250100, P.R. China. E-mail: bxzhao@sdu.edu.cn  
(B.X. Zhao); Tel.: +86 531 88366425; fax: +86 531 88564464.*

<sup>b</sup> *Institute of Developmental Biology, School of Life Science, Shandong  
University, Jinan 250100, P.R. China. E-mail: miaojy@sdu.edu.cn (J.Y. Miao).*

## Table of Contents

|                                                                                                                                        |   |
|----------------------------------------------------------------------------------------------------------------------------------------|---|
| 1. Synthesis of <b>N1</b> and <b>N2</b> .....                                                                                          | 3 |
| 2. <b>Fig. S1</b> $^1\text{H}$ NMR spectrum of probe <b>RNL</b> .....                                                                  | 3 |
| 3. <b>Fig. S2</b> $^{13}\text{C}$ NMR spectrum of probe <b>RNL</b> .....                                                               | 3 |
| 4. <b>Fig. S3</b> Infrared spectrum of probe <b>RNL</b> .....                                                                          | 4 |
| 5. <b>Fig. S4</b> High resolution mass spectrum of probe <b>RNL</b> .....                                                              | 4 |
| 6. <b>Fig. S5</b> Normalized emission spectrum of dyad <b>RNL</b> at pH 7.20 and<br>absorption spectrum of <b>1</b> at pH<br>4.20..... | 5 |
| 7. <b>Fig. S6</b> Absorption spectra of <b>RNL</b> .....                                                                               | 5 |
| 8. <b>Fig. S7</b> Emission spectrum of <b>RNL</b> and <b>1</b> at pH 4.70. $\lambda_{\text{ex}} = 390 \text{ nm}$ .....                | 6 |
| 9. <b>Fig. S8</b> Fluorescence spectra of <b>N1</b> .....                                                                              | 6 |
| 10. <b>Fig. S9</b> Fluorescence spectra of <b>N2</b> .....                                                                             | 7 |
| 11. <b>Fig. S8</b> The ratios of fluorescence intensity of <b>RNL</b> at pH 4.50 after being<br>incubated for different periods.....   | 7 |
| 12. <b>Fig. S11</b> Emission intensity of <b>RNL</b> at $\lambda_{\text{ex}} = 390 \text{ nm}$ and $488 \text{ nm}$ .....              | 8 |
| 13. <b>Fig. S12</b> Effect of <b>RNL</b> on the cell viability of HeLa cells.....                                                      | 8 |
| 14. <b>Photostability experiment (Fig. S13)</b> .....                                                                                  | 9 |
| 15. <b>Reference</b> .....                                                                                                             | 9 |

## Synthesis of N1 and N2

Compound **N1** and **N2** were synthesized according to the literature.<sup>S1,S2</sup>

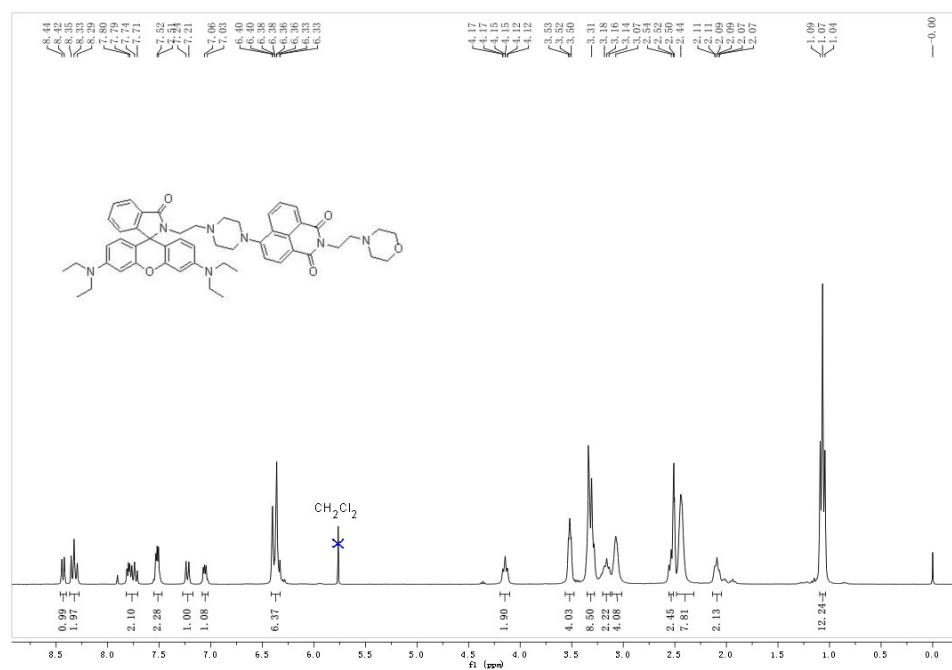

**Fig. S1** <sup>1</sup>H NMR spectrum of probe **RNL**.

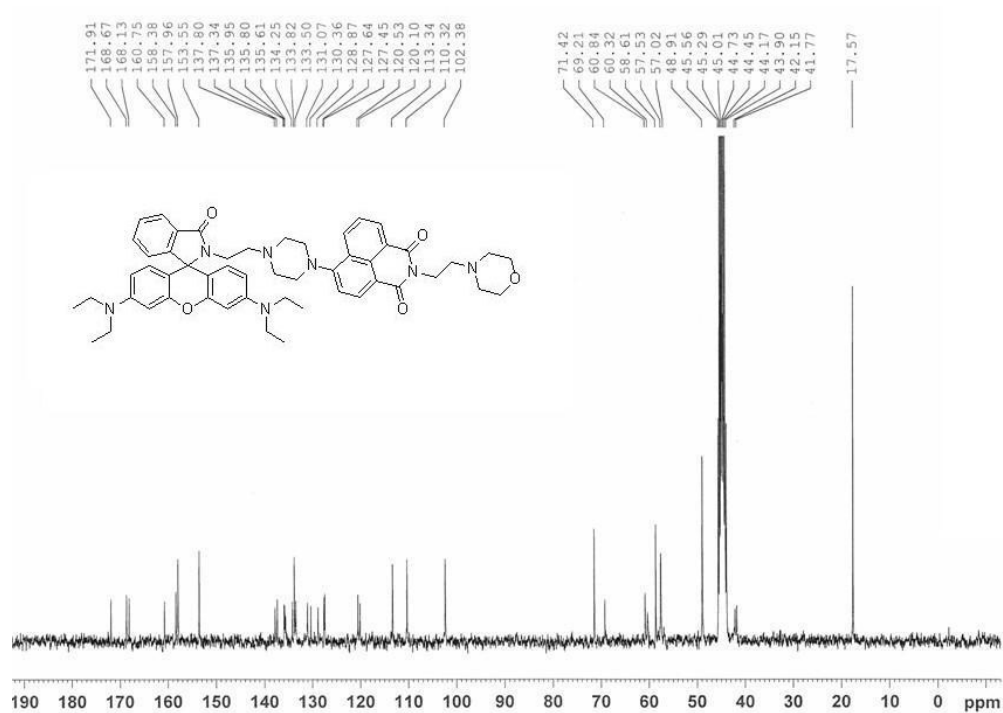

**Fig. S2**  $^{13}\text{C}$  NMR spectrum of probe RNL.

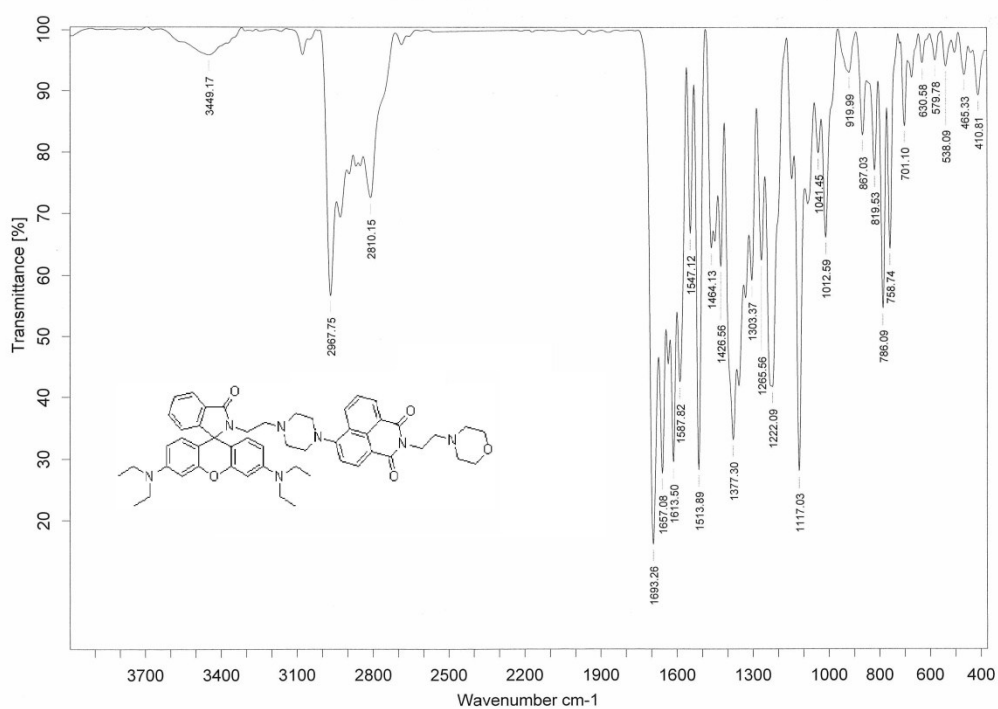

**Fig. S3** Infrared spectrum of probe RNL.

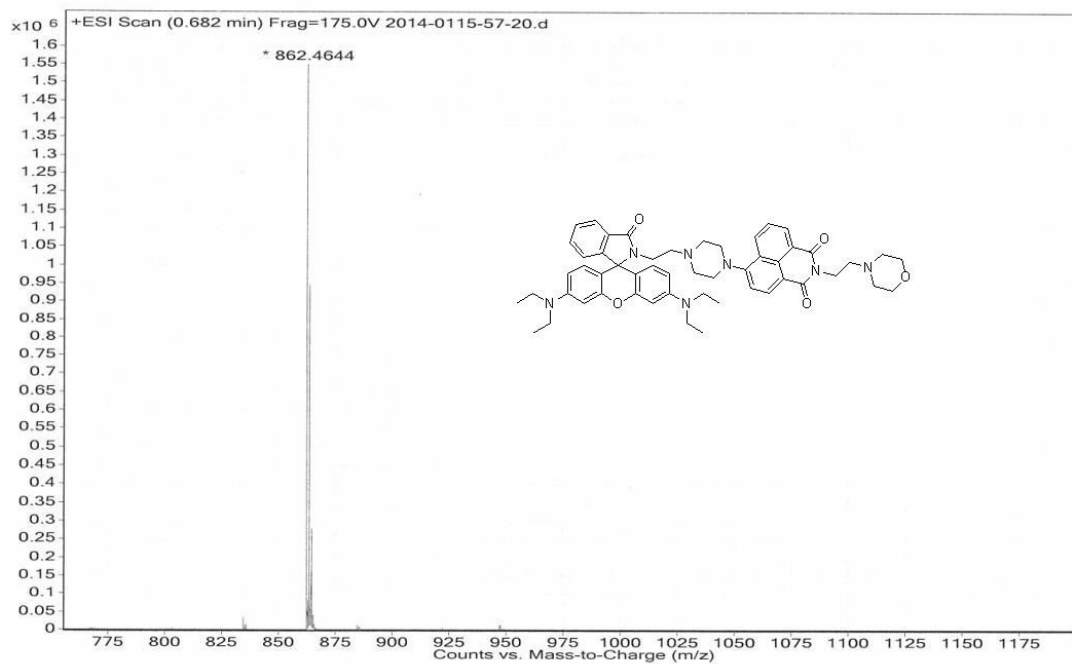

**Fig. S4** High resolution mass spectrum of probe RNL.

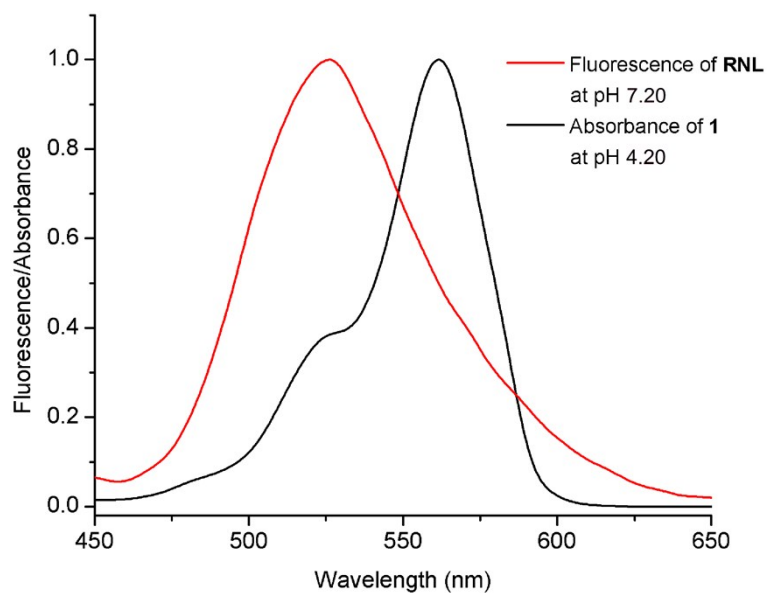

**Fig. S5** Normalized emission spectrum of dyad **RNL** (5  $\mu$ M) at pH 7.20 ( $\lambda_{\text{ex}}$  = 390 nm) and absorption spectrum of compound **1** (5  $\mu$ M) at pH 4.20 in the B-R buffer/EtOH (9/1, V/V) solution.

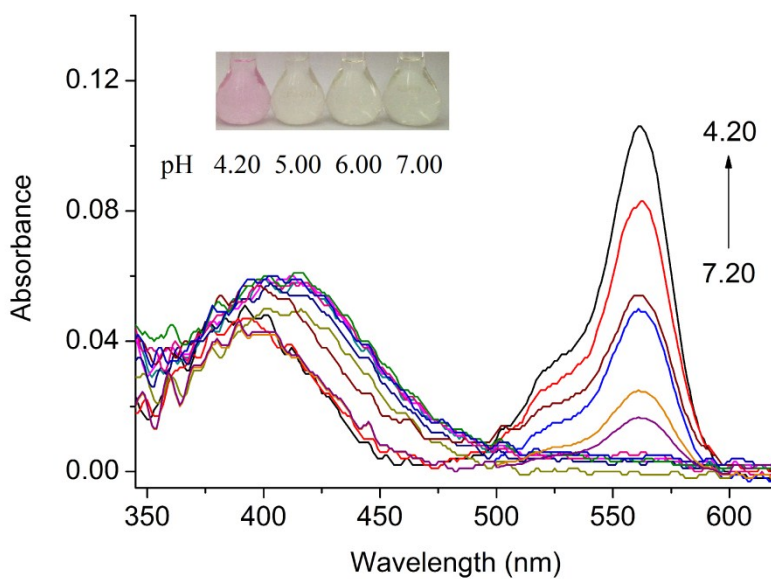

**Fig. S6** Absorption spectra of **RNL** (5  $\mu$ M) in the B-R buffer/EtOH (9/1, V/V) solution at different pH values (7.20, 7.00, 6.40, 6.00, 5.60, 5.20, 5.00, 4.80, 4.60, 4.40, 4.20).

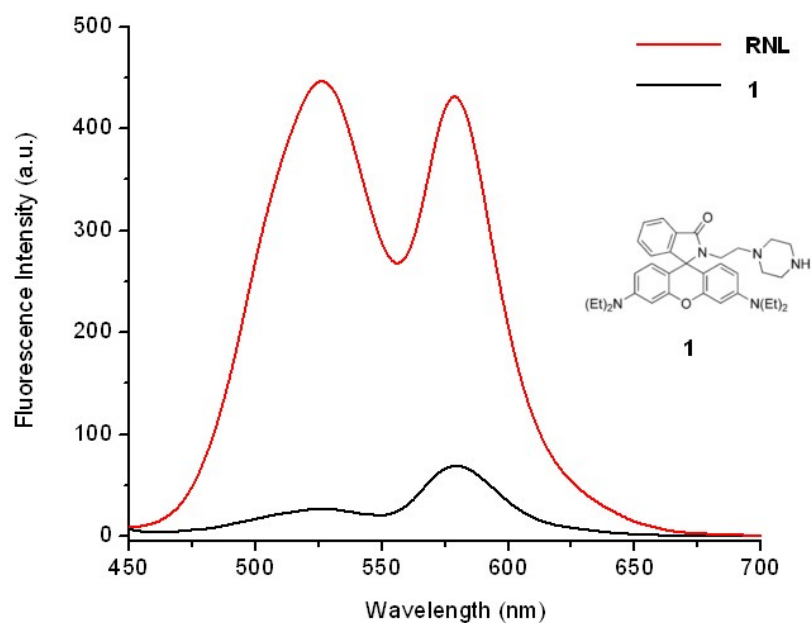

**Fig. S7** Emission spectrum of dyad **RNL** (5  $\mu$ M) and compound **1** (5  $\mu$ M) at pH 4.70 in the B-R buffer/EtOH (9/1, V/V) solution.  $\lambda_{\text{ex}}$  = 390 nm.

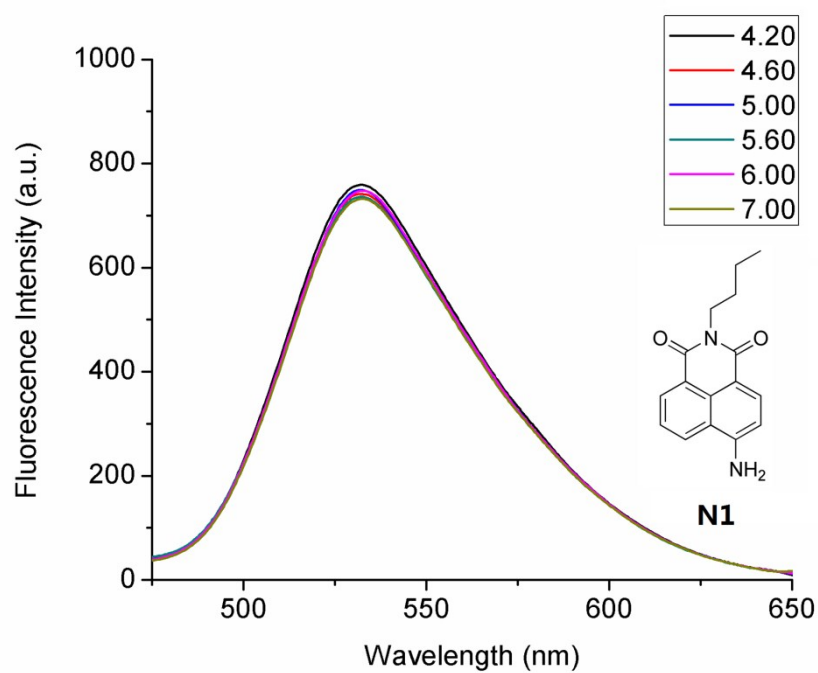

**Fig. S8** Fluorescence spectra of **N1** (5  $\mu$ M) in the B-R buffer/EtOH (9/1, V/V) solution at different pH values.  $\lambda_{ex}$  = 438 nm.

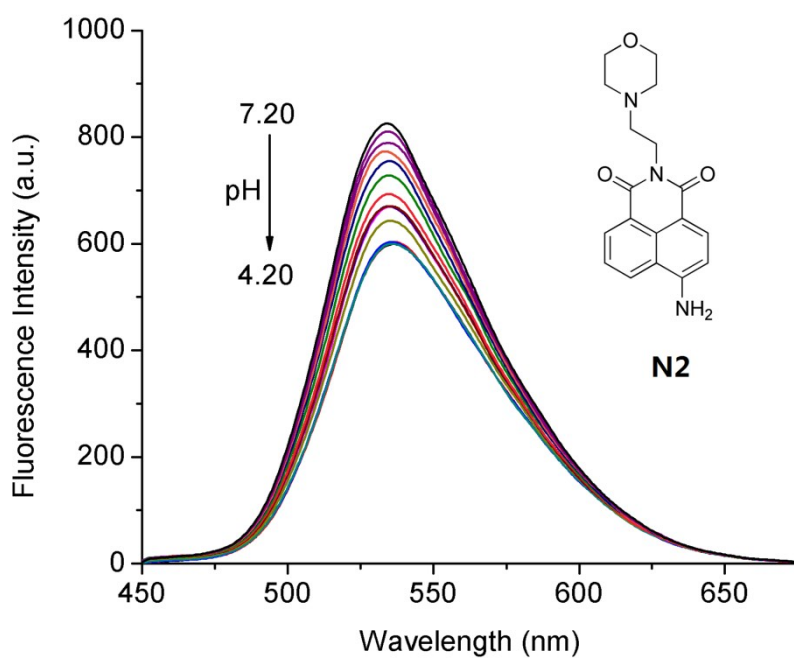

**Fig. S9** Fluorescence spectra of **N2** (5  $\mu$ M) in the B-R buffer/EtOH (9/1, V/V) solution at different pH values.  $\lambda_{ex}$  = 438 nm.

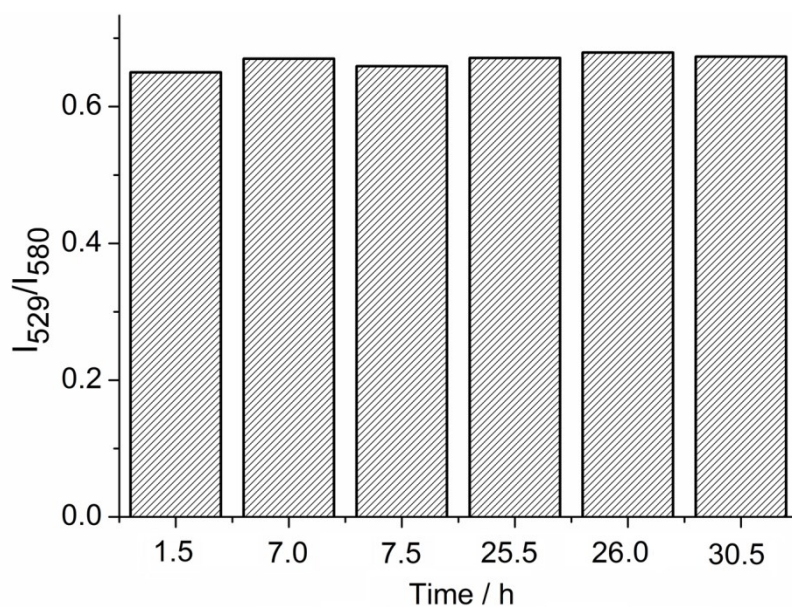

**Fig. S10** The ratios of fluorescence intensity of **RNL** (5  $\mu$ M) at 529 nm and 580 nm ( $I_{529}/I_{580}$ ) at pH 4.50 after being incubated in the B-R buffer/EtOH (9/1, V/V) solution for 1.5, 7.0, 7.5, 25.5, 26.0, 30.5 h at room temperature.  $\lambda_{ex}$  = 390 nm.

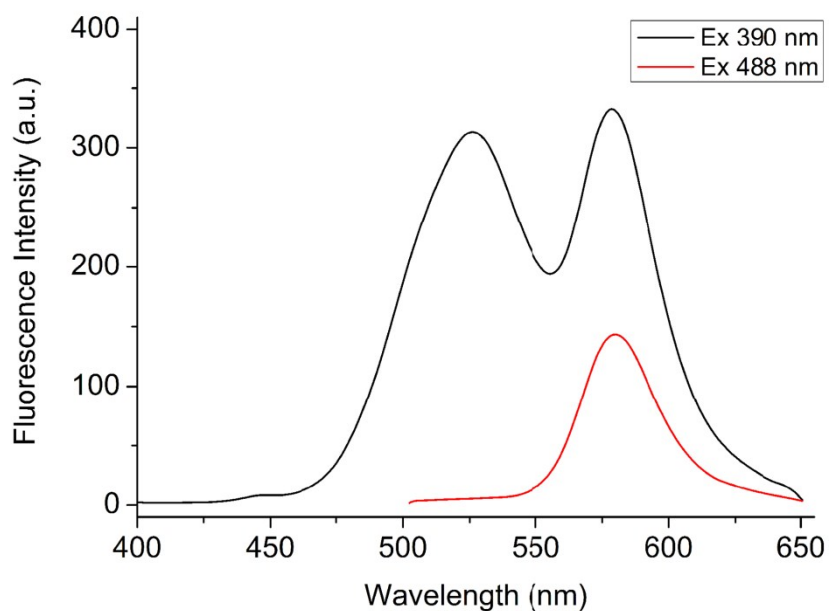

**Fig. S11** Emission intensity of **RNL** (5  $\mu$ M) at pH 4.70 in the B-R buffer/EtOH (9/1, V/V) solution at  $\lambda_{ex}$  = 390 nm and  $\lambda_{ex}$  = 488 nm.

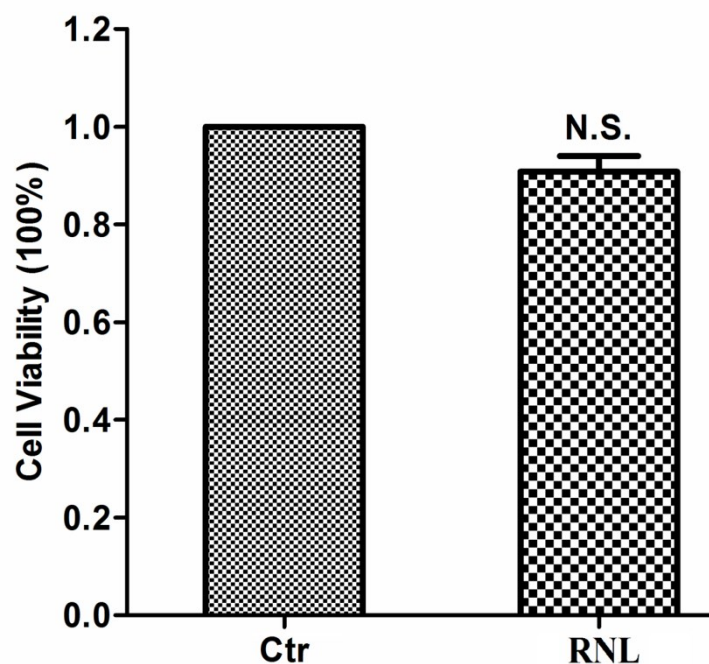

**Fig. S12** Effect of **RNL** on the cell viability of HeLa cells. HeLa cells were incubated with 10  $\mu$ M **RNL** for 24 h. The cell viability was measured by SRB assays.

### Photostability experiment

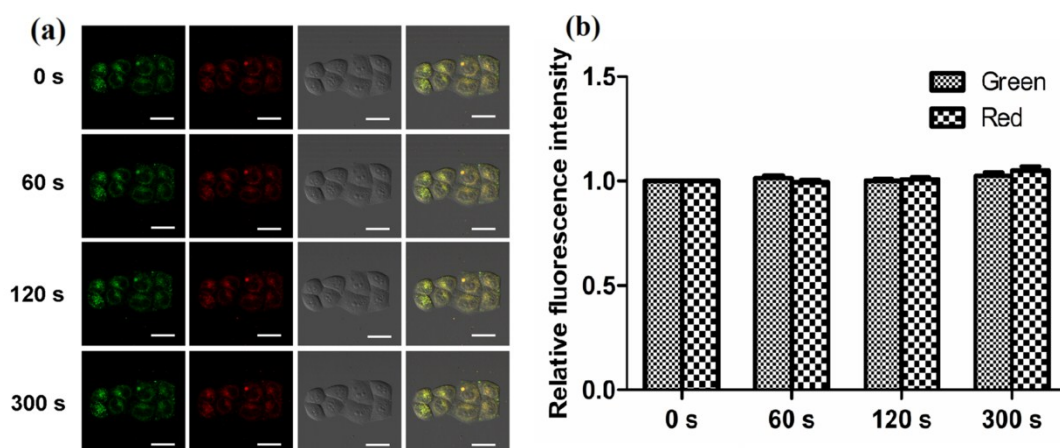

**Fig. S13** Photostability experiment of **RNL** (10  $\mu$ M) in HeLa cells. (a) Fluorescence microscope images of HeLa cells after 0, 60, 120 and 300 s of continuous irradiation.  $\lambda_{\text{ex}} = 405$  nm. First column: fluorescence images at green channel (400-555 nm), second column: fluorescence images at red channel (560-700 nm), third column:

bright field images, fourth column: overlay images of first, second and third column.  
(b) Relative fluorescence intensity in cells at different periods of time [the initial fluorescence intensity (i.e., at about 0 s) was defined as 1.0]. Fluorescence intensity quantitation was analyzed by the Image J. The results were presented as means  $\pm$  SE with replicates n = 3. Scale bar, 20  $\mu$ m.

## Reference

- S1 L. Cui, Z. X. Peng, C. F. Ji, J. H. Huang, D. T. Huang, J. Ma, S. P. Zhang, X. H. Qian and Y. F. Xu, *Chem. Commun.*, 2014, **50**, 1485.
- S2 E. B. Veale, D. O. Frimannsson, M. Lawler and T. Gunnlaugsson, *Org. Lett.*, 2009, **11**, 4040.
